# Supplementary material
Source: publisher figshare collection journal article supplement (https://gsajournals.figshare.com/ndownloader/files/28852488)
Supplement: Supplementary file 1 [file 28852488]

## Sheet: Sheet1
Data type	Experimental species	Symbol/name used in publication	Source – public	Source – published	Source – unpublished	Identifiers	New reagent	Comments
Data type (mandatory) Duplicate rows as needed. Order is flexible, but row titles must be preserved.	Experimental species (mandatory, "NA" okay)	Symbol/name used in publication (mandatory)	Source – public [stock center; company, data repository] (one of D,E,F mandatory)	Source -- published [PMID or 'this paper'] (one of D,E,F mandatory)	Source – unpublished [description, incl. lab of origin] (one of D,E,F mandatory)	Identifiers [format as ID_source:identifier] Separate multiple entries with semi-colon, space	New reagent (mandatory for new entities) Description, progenitor(s)	Comments (optional) Genotypes, purpose of reagent, additional information
gene (source not applicable)	D. rerio	met				ZFIN:ZDB-GENE-041014-1; NCBI:100150664
gene (source not applicable)	D. rerio	hgfa				ZFIN:ZDB-GENE-041014-2; NCBI:493781
gene (source not applicable)	D. rerio	olig1				ZFIN:ZDB-GENE-050107-2; NCBI:100001484
gene (source not applicable)	D. rerio	sox10				ZFIN:ZDB-GENE-011207-1; NCBI:140616
strain, strain_background	D. rerio	AB*	ZIRC			RRID:ZFIN_ZDB-GENO-960809-7
genetic reagent (in whole organism)	D. rerio	Tg(olig2:egfp)vu12		PMID: 14739582		RRID:ZFIN_ZDB-ALT-041129-8
genetic reagent (in whole organism)	D. rerio	Tg(sox10(4.9):tagrfp)uva5		PMID: 31495570		RRID:ZFIN_ZDB-ALT-200513–7
genetic reagent (in whole organism)	D. rerio	Tg(met:egfp)		This paper
genetic reagent (in whole organism)	D. rerio	Tg(sox10(7.2):mrfp)vu234		PMID: 18176560		RRID:ZFIN_ZDB-ALT-080321–3
genetic reagent (in whole organism)	D. rerio	metuva38		This paper
genetic reagent (in whole organism)	D. rerio	Tg(sox10(4.9):DNmet::IRES:egfp; cry:egfp)uva40		This paper
genetic reagent (in whole organism)	D. rerio	Tg(olig1(5.3):DNmet::IRES:EGFP; cry:EGFP)uva39		This paper
genetic reagent (in whole organism)	D. rerio	hgfafh529		PMID: 32302545		RRID:ZDB-ALT-201203-11
genetic reagent (in whole organism)	D. rerio	metfh534		This paper
antibody	NA	Rabbit anti-sox10		PMID: 23467342				1:5000
antibody	NA	Alexa Fluor 647 goat anti-rabbit IgG(H+L)	ThermoFisher			Cat. #A-21244; RRID:AB_2535812		1:1000
antibody	NA	mouse 3D4 anti-met	ThermoFisher			Cat. #18-7366; RRID:AB_2533047		1:100
antibody	NA	Alexa Fluor 647 goat anti-mouse IgG(H+L)	ThermoFisher			Cat. #A-21235; RRID:AB_2535804		1:1000
recombinant DNA reagent		p3E-IRES-EGFPpA		PMID: 17937395
recombinant DNA reagent		pDestTol2pA2		PMID: 17937395
recombinant DNA reagent		p5E-sox10(-4.9)		PMID: 17065232
recombinant DNA reagent		pME-DNmet		This paper
recombinant DNA reagent		p5E-olig1		This paper
recombinant DNA reagent		pME-MCS		PMID: 17065232
sequence-based reagent		olig1 F		This paper		PCR Primers		5’-GTATGAAGCCTCTTGGCACAG-3’
sequence-based reagent		olig1 R		This paper		PCR Primers		5’-CTGAAAAAAGATATTCAGAGAACATGG-3
sequence-based reagent		DNmet F		This paper		PCR Primers		5’-CAACATCGACAAAATGACACCCTTCCCCTCTCTCATATCATCTCAG-3
sequence-based reagent		DNmet R		This paper		PCR Primers		5’-ACGAAGGTGGTGTTCAGGAGGATGAAGTGCTCTCCGCTGAAGC-3’.
sequence-based reagent		metuva38 F		This paper		PCR Primers		5’- ATCGTACGCATGTGTTCTTCAG-3
sequence-based reagent		metuva38 R		This paper		PCR Primers		5’- TGATGTCCGTGATGGAGATAAG-3
sequence-based reagent		ef1α F		This paper		PCR Primers		5’-GAGACTGGTGTCCTCAAGCC-3’
sequence-based reagent		ef1α R		This paper		PCR Primers		5’-CCAACGTTGTCACCAGGAGT-3’,
sequence-based reagent		metfh534 F		This paper		PCR Primers		5’-AATCTCTGCCATGTTTTCCTGT-3’
sequence-based reagent		metfh534 R		This paper		PCR Primers		5’- AGTCCAAAACTATCCCAAGCAA-3’.
commercial assay or kit	NA	pENTR 5' TOPO	Invitrogen			Cat. #K59120
commercial assay or kit	NA	LR Clonase II plus	Invitrogen			Cat. #12538–120
commercial assay or kit	NA	Click-it EdU Cell proliferation kit for imaging. Alexa Fluor 647 dye	Invitrogen			Cat. #C11340
commercial assay or kit	NA	Q5 Site-Directed Mutagenesis Kit	NEB			Cat #E0554S
chemical compound, drug	NA	1-phenyl-2-thiourea	Sigma			Cat. #P7629
chemical compound, drug	NA	Tricaine-S (MS 222)	Syndel USA (formerly Western Chemical)			SKU: Tricaine1G
chemical compound, drug	NA	L1200 Kinase Inhibitor Library	Selleck Chem			Cat. #L1200
chemical compound, drug	NA	MK2461	Selleck Chem			Cat. #S2774
chemical compound, drug	NA	Trichostatin A (TSA)	Selleck Chem			Cat. #S1045
software, algorithm	NA	ImageJ/Fiji	ImageJ.nih.gov			RRID:SCR_003070
software, algorithm	NA	Prism 9	GraphPad softwares			RRID:SCR_002368
software, algorithm	NA	Metamorph	Molecular Devices			RRID:SCR_007370
software, algorithm	NA	Automated Cell-Tracking Software		PMID: 30598726
other
